# Supplementary material for: Resolving conformational changes that mediate a two-step catalytic mechanism in a model enzyme
Source: PubMed Central journal article supplement — bioRxiv. 2023 Jun 3:2023.06.02.543507. Preprint. [Version 1] doi: 10.1101/2023.06.02.543507 (PMC10312612; doi:10.1101/2023.06.02.543507), 2023-06-03
Supplement: NIHPP2023.06.02.543507v1-supplement-1.pdf [file NIHPP2023.06.02.543507v1-supplement-1.pdf]

# Supplementary Figures and Tables

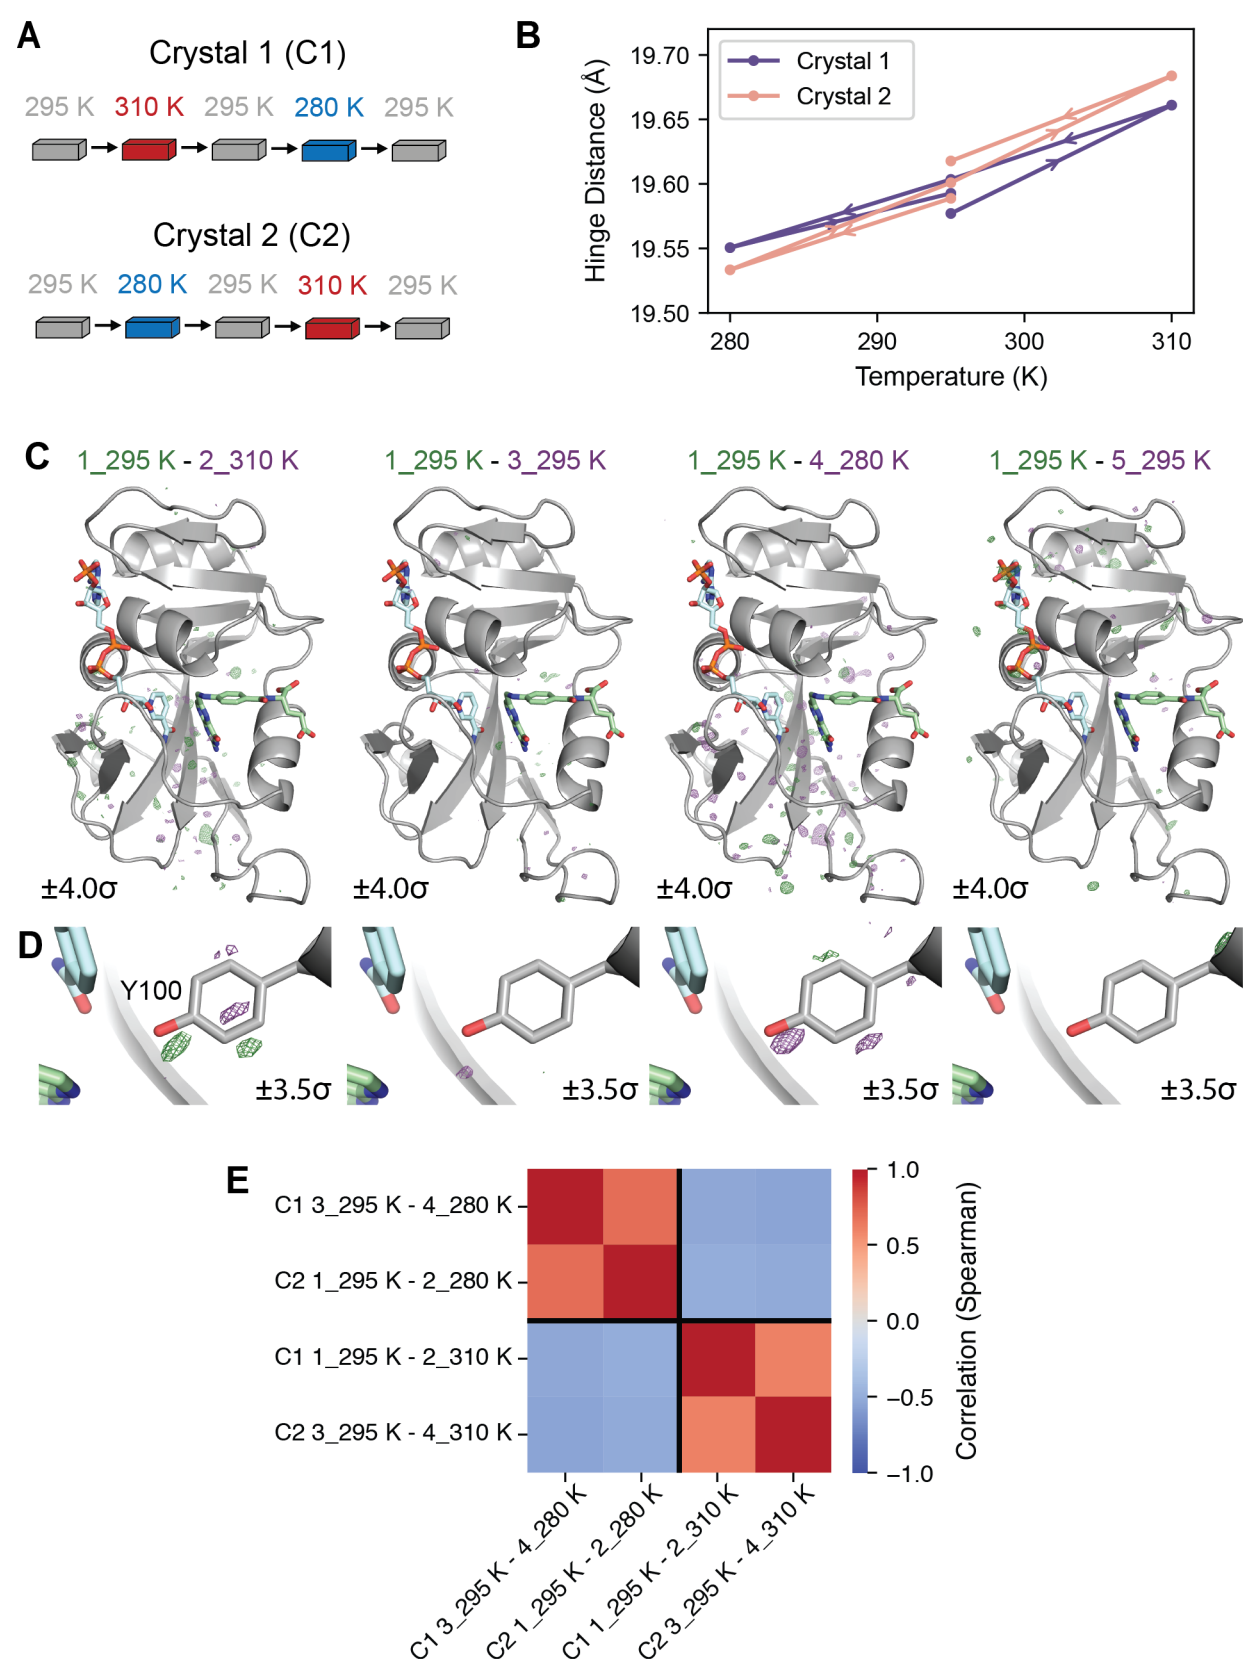

**Fig. S1** Caption on following page.

**Figure S1: Reversibility and reproducibility of multi-temperature diffraction experiments.** (A) Schematic of single-crystal, multi-temperature diffraction experiments. (B) Plots of the refined hinge distance versus temperature for both single-crystal experiments demonstrate that the experiment is reversible. (C) Temperature-resolved difference maps between the first dataset from crystal 1 and the subsequent four datasets. More significant density peaks are observed for maps generated from datasets collected at different temperatures. (D) Zoom-in on Tyr100 in the difference maps emphasizes that observed features are temperature-dependent (carved within 2 Å of Tyr100). (E) Heatmap of the Spearman correlation coefficients between difference structure factor amplitudes computed from independent single-crystal experiments. Equivalent temperature changes yield strongly correlated difference amplitudes, while the opposite temperature changes produce strongly anti-correlated results. This demonstrates that the observed structural changes in the single-crystal, multi-temperature experiments are reproducible between independent experiments.

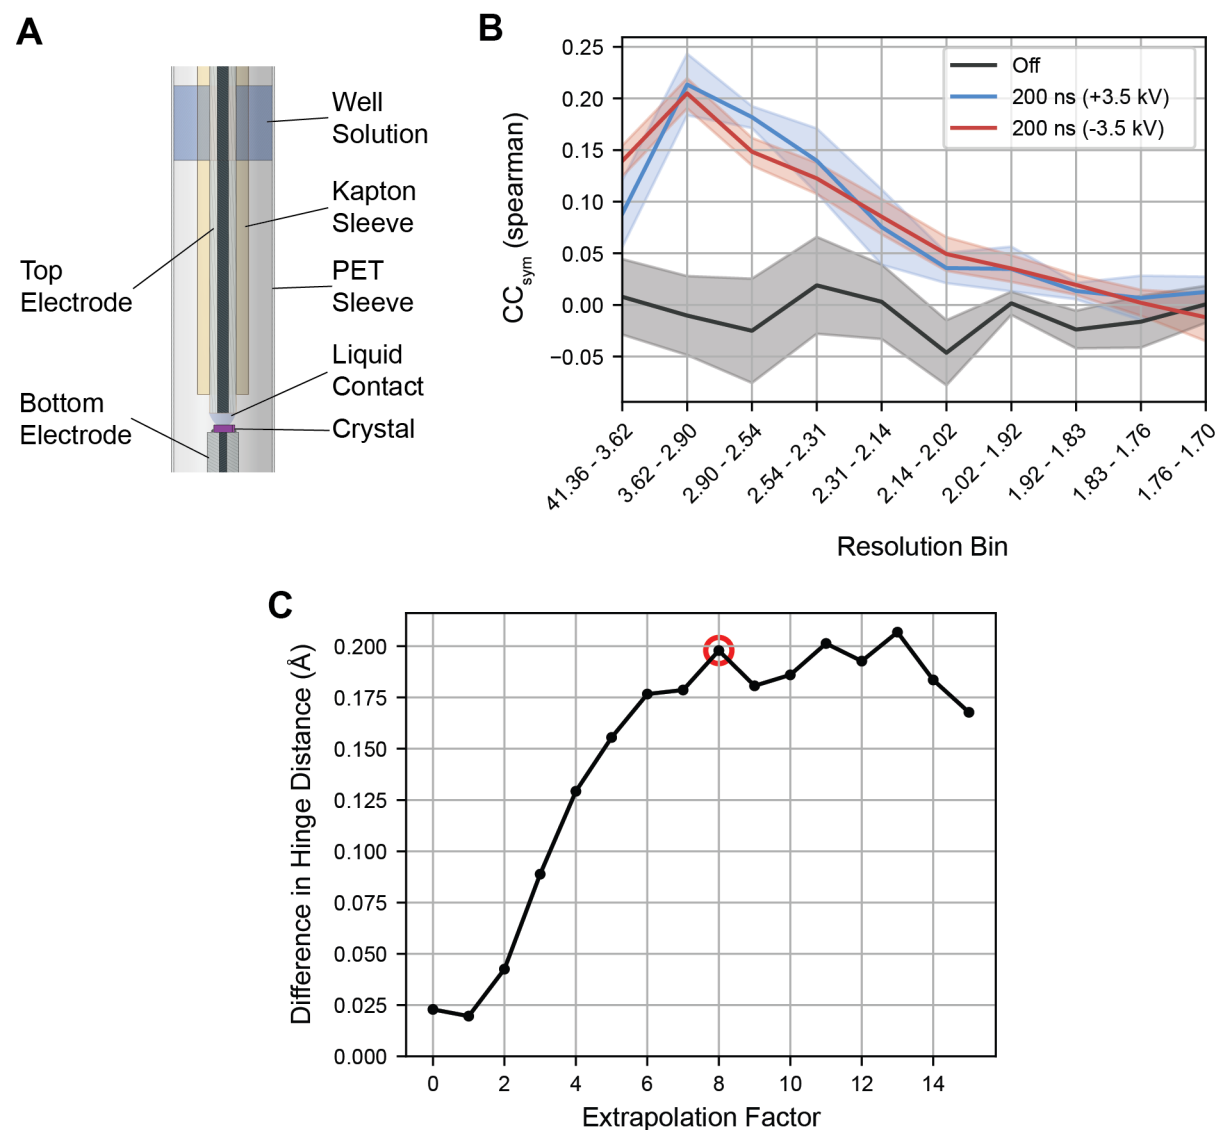

**Fig. S2 Experimental apparatus and analysis for electric-field-stimulated X-ray diffraction of *ecDHFR*.** (A) Diagram of the revised experimental apparatus for EF-X. Liquid contact is made within a band of well solution that is osmotically matched to the crystal, ensuring a high humidity environment for the duration of the experiment. (B) Plot of  $CC_{sym}$  versus resolution bin.  $CC_{sym}$  is an indicator of the reproducibility of observed symmetry breaking during an EF-X experiment. The 95% confidence interval from 5 random partitions of the diffraction images is shown. For the 'Off' dataset in which the symmetry operation is preserved, no significant correlation between half-datasets is expected because differences for symmetry-related observations should only reflect experimental error. The positive correlations for differences measured during the high-voltage pulses indicates significant electric-field-dependent symmetry breaking. (C) Plot of the refined difference in hinge distance between the two copies of DHFR in the  $P2_1$  ASU as a function of extrapolation factor. With an extrapolation factor of zero, the data is equivalent to 'Off' structure factor amplitudes processed in the reduced-symmetry spacegroup. The difference in hinge distance increases linearly with extrapolation factor until a value of 8 and plateaus at a difference of approximately 0.2 Å. The extrapolation factor chosen for ESF refinement of the excited state is indicated with a red circle.

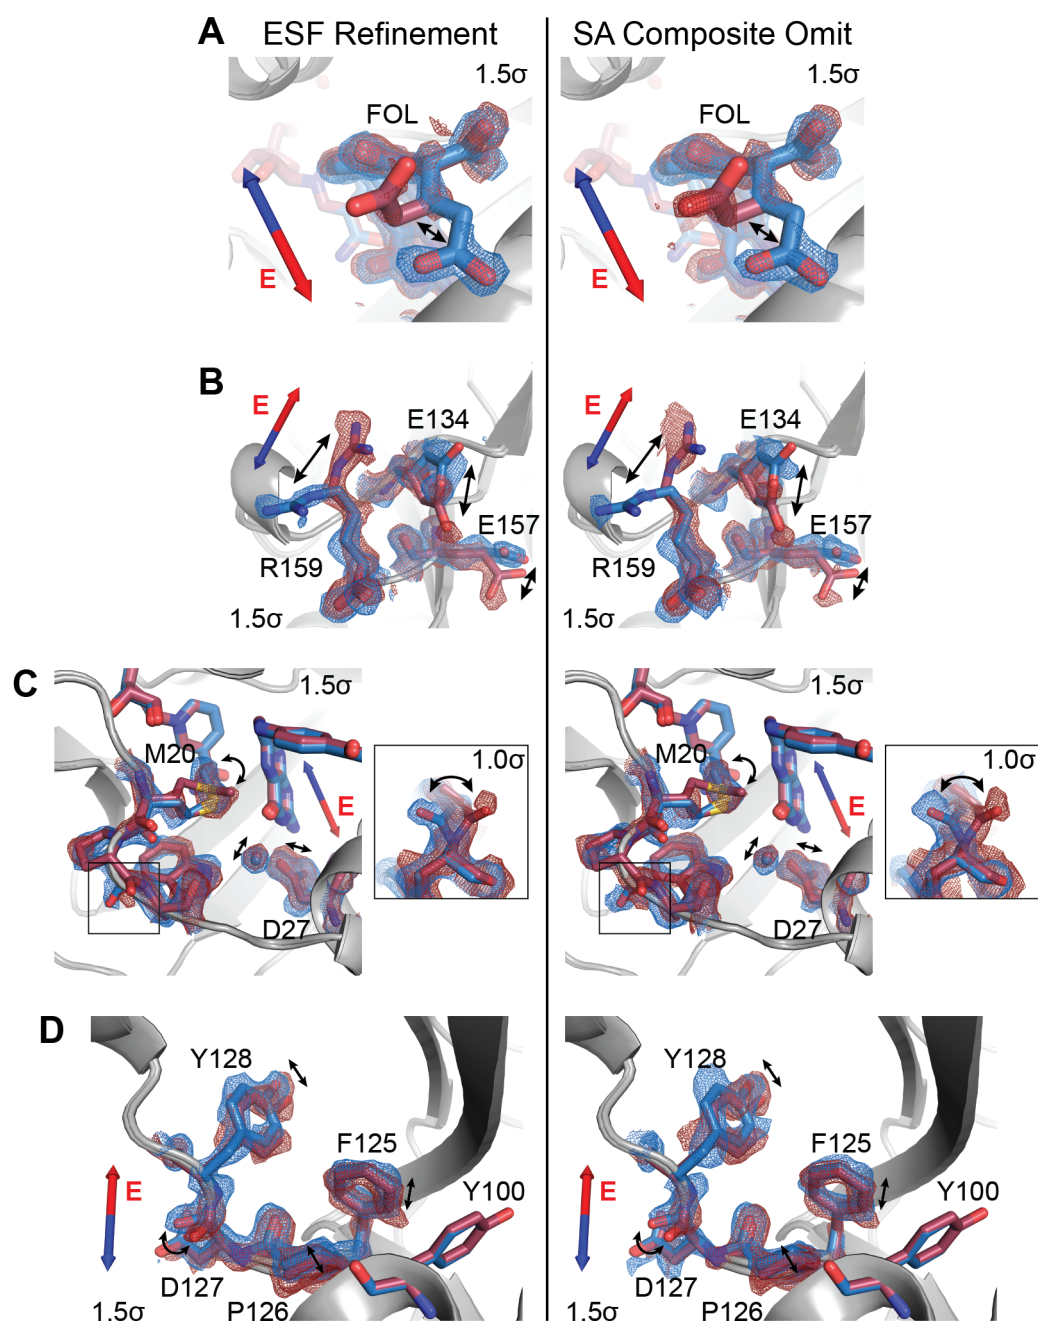

**Fig. S3** Composite omit maps validate modeling of EF-X excited state. (A) to (D) Comparison of  $2mF_o - DF_c$  maps from ESF refinement (left column) and corresponding simulated annealing (SA) composite omit maps (right column). Superposed models and maps from both protein molecules of the excited-state ASU highlight electric-field induced structural changes. Blue and red arrows depict electric field vector for the blue and red models, respectively, and maps are contoured at  $1.5\sigma$  and carved within 1.5 Å of shown atoms. (A) Carboxylate sidechain of folate and (B) charged sidechains near the C-terminus demonstrate electric-field-dependent structural changes consistent with the formal charges of the residues. (C) Active site residues and Pro21 backbone carbonyl (inset; contoured at  $1.0\sigma$ ) differs between protein molecules. (D) Conformational changes among residues 125 to 128. The similarity between the electron density maps from ESF refinement and the SA composite omit maps indicates that the observed structural differences between the molecules of the excited-state ASU are not the result of modeling bias.

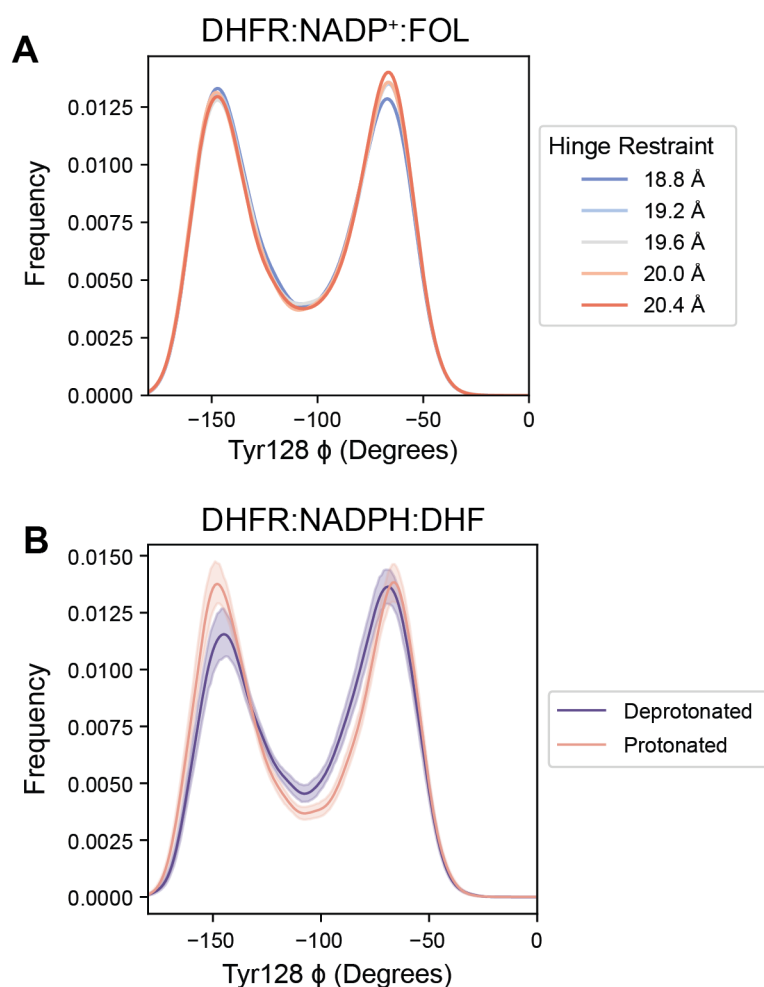

**Fig. S4 Tyr128 backbone conformations in MD simulations.** (A) Kernel density estimates of the Tyr128- $\phi$  dihedral from MD simulations at each imposed hinge distance restraint. The Tyr128- $\phi$  dihedral does not exhibit a monotonic relationship as a function of hinge distance. (B) Kernel density estimates of the Tyr128- $\phi$  dihedral from MD simulations of the reactive ternary complex (95% confidence interval is shown). The Tyr128- $\phi$  dihedral distribution is altered by substrate protonation.

**Table S1** Summary statistics for  
DHFR:NADP<sup>+</sup>:MFOL complex

|                                   |                                                       |
|-----------------------------------|-------------------------------------------------------|
| PDB ID                            | 8DAI                                                  |
| Temperature                       | 285 K                                                 |
| Data Collection <sup>1</sup>      |                                                       |
| Wavelength (Å)                    | 0.9537                                                |
| Spacegroup                        | <i>P</i> 2 <sub>1</sub> 2 <sub>1</sub> 2 <sub>1</sub> |
| Cell dimensions (Å)               |                                                       |
| a, b, c                           | 34.25, 45.36, 98.85                                   |
| Total observations                | 2,736,784                                             |
| Unique observations               | 105,471                                               |
| Resolution (Å)                    | 49.42 - 1.14                                          |
|                                   | (1.16 - 1.14)                                         |
| Multiplicity                      | 25.9 (14.4)                                           |
| Completeness (%)                  | 97.2 (73.0)                                           |
| Mean <i>I</i> / $\sigma$ <i>I</i> | 11.9 (0.4)                                            |
| R <sub>pim</sub>                  | 0.028 (0.980)                                         |
| CC <sub>1/2</sub>                 | 0.999 (0.326)                                         |
| Refinement <sup>2</sup>           |                                                       |
| R <sub>work</sub> (%)             | 12.68                                                 |
| R <sub>free</sub> (%)             | 16.00                                                 |
| R.M.S. Deviations                 |                                                       |
| Bonds (Å)                         | 0.013                                                 |
| Angles (°)                        | 1.357                                                 |
| Wilson B (Å <sup>2</sup> )        | 15.57                                                 |
| Mean B factor (Å <sup>2</sup> )   |                                                       |
| Total                             | 22.97                                                 |
| Macromolecules                    | 21.07                                                 |
| Ligands                           | 21.71                                                 |
| Water                             | 39.71                                                 |
| Clashscore                        | 2.23                                                  |
| Ramachandran                      |                                                       |
| Favored (%)                       | 98.70                                                 |
| Allowed (%)                       | 1.30                                                  |
| Outliers (%)                      | 0.00                                                  |

<sup>1</sup> Reported by *dials.scale* in *DIALS* [44]

<sup>2</sup> Reported by *PHENIX* [50]

**Table S2** Summary statistics for datasets at 270 K

| Crystal<br>PDB ID               | 1<br>5SSS                                             | 2<br>5SST                                             | 3<br>5SSU                                             | 4<br>5SSV                                             |
|---------------------------------|-------------------------------------------------------|-------------------------------------------------------|-------------------------------------------------------|-------------------------------------------------------|
|                                 | Data Collection <sup>1</sup>                          |                                                       |                                                       |                                                       |
| Wavelength (Å)                  | 0.8265                                                | 0.8265                                                | 0.8265                                                | 0.8265                                                |
| Spacegroup                      | <i>P</i> 2 <sub>1</sub> 2 <sub>1</sub> 2 <sub>1</sub> |
| Cell dimensions (Å)             |                                                       |                                                       |                                                       |                                                       |
| a                               | 34.11                                                 | 34.08                                                 | 34.10                                                 | 34.12                                                 |
| b                               | 45.34                                                 | 45.29                                                 | 45.18                                                 | 45.26                                                 |
| c                               | 99.11                                                 | 99.00                                                 | 99.09                                                 | 99.06                                                 |
| Total observations              | 2,999,634                                             | 3,330,004                                             | 3,101,071                                             | 3,366,693                                             |
| Unique observations             | 107,967                                               | 128,870                                               | 109,637                                               | 125,784                                               |
| Resolution (Å)                  | 49.56 - 1.14<br>(1.16 - 1.14)                         | 33.41 - 1.07<br>(1.09 - 1.07)                         | 32.24 - 1.12<br>(1.14 - 1.12)                         | 45.26 - 1.08<br>(1.10 - 1.08)                         |
| Multiplicity                    | 27.8 (28.1)                                           | 25.8 (27.6)                                           | 28.3 (29.5)                                           | 26.8 (27.7)                                           |
| Completeness (%)                | 99.8 (99.9)                                           | 98.7 (96.6)                                           | 96.3 (93.6)                                           | 98.8 (96.5)                                           |
| Mean <i>I</i> / $\sigma_I$      | 13.7 (0.7)                                            | 22.5 (1.5)                                            | 18.6 (0.5)                                            | 19.7 (0.4)                                            |
| R <sub>pim</sub>                | 0.077 (2.382)                                         | 0.101 (2.200)                                         | 0.134 (2.876)                                         | 0.077 (3.610)                                         |
| CC <sub>1/2</sub>               | 0.999 (0.400)                                         | 0.999 (0.551)                                         | 0.999 (0.415)                                         | 0.999 (0.309)                                         |
|                                 | Refinement <sup>2</sup>                               |                                                       |                                                       |                                                       |
| R <sub>work</sub> (%)           | 14.70                                                 | 13.00                                                 | 13.93                                                 | 13.98                                                 |
| R <sub>free</sub> (%)           | 16.74                                                 | 14.82                                                 | 16.89                                                 | 17.38                                                 |
| R.M.S. Deviations               |                                                       |                                                       |                                                       |                                                       |
| Bonds (Å)                       | 0.010                                                 | 0.007                                                 | 0.008                                                 | 0.012                                                 |
| Angles (°)                      | 1.085                                                 | 1.018                                                 | 1.027                                                 | 1.237                                                 |
| Wilson B (Å <sup>2</sup> )      | 16.04                                                 | 15.50                                                 | 15.85                                                 | 15.12                                                 |
| Mean B factor (Å <sup>2</sup> ) |                                                       |                                                       |                                                       |                                                       |
| Total                           | 21.71                                                 | 21.28                                                 | 22.90                                                 | 21.95                                                 |
| Macromolecules                  | 20.11                                                 | 19.64                                                 | 21.16                                                 | 20.29                                                 |
| Ligands                         | 19.14                                                 | 18.73                                                 | 20.27                                                 | 19.27                                                 |
| Water                           | 37.28                                                 | 36.80                                                 | 39.62                                                 | 38.19                                                 |
| Clashscore                      | 1.57                                                  | 1.27                                                  | 0.94                                                  | 1.57                                                  |
| Ramachandran                    |                                                       |                                                       |                                                       |                                                       |
| Favored (%)                     | 99.35                                                 | 99.35                                                 | 99.35                                                 | 99.35                                                 |
| Allowed (%)                     | 0.65                                                  | 0.65                                                  | 0.65                                                  | 0.65                                                  |
| Outliers (%)                    | 0.00                                                  | 0.00                                                  | 0.00                                                  | 0.00                                                  |

<sup>1</sup> Reported by *dials.scale* in *DIALS* [44]

<sup>2</sup> Reported by *PHENIX* [50]

**Table S3** Summary statistics for datasets at 280 K

| Crystal<br>PDB ID               | 1<br>7FPL                                             | 2<br>7FPM                                             | 3<br>7FPN                                             | 4<br>7FPO                                             | 5<br>7FPP                                             |
|---------------------------------|-------------------------------------------------------|-------------------------------------------------------|-------------------------------------------------------|-------------------------------------------------------|-------------------------------------------------------|
| Data Collection <sup>1</sup>    |                                                       |                                                       |                                                       |                                                       |                                                       |
| Wavelength (Å)                  | 0.8265                                                | 0.8265                                                | 0.8265                                                | 0.8265                                                | 0.8265                                                |
| Spacegroup                      | <i>P</i> 2 <sub>1</sub> 2 <sub>1</sub> 2 <sub>1</sub> |
| Cell dimensions (Å)             |                                                       |                                                       |                                                       |                                                       |                                                       |
| a                               | 34.12                                                 | 34.16                                                 | 34.14                                                 | 34.18                                                 | 34.20                                                 |
| b                               | 45.50                                                 | 45.51                                                 | 45.44                                                 | 45.55                                                 | 45.47                                                 |
| c                               | 99.05                                                 | 99.08                                                 | 99.04                                                 | 99.08                                                 | 99.09                                                 |
| Total observations              | 2,800,998                                             | 3,839,113                                             | 3,322,423                                             | 3484869                                               | 3,946,244                                             |
| Unique observations             | 98,434                                                | 142,620                                               | 141,821                                               | 135,454                                               | 134,271                                               |
| Resolution (Å)                  | 32.26 - 1.17<br>(1.19 - 1.17)                         | 45.51 - 1.04<br>(1.06 - 1.04)                         | 45.44 - 1.04<br>(1.06 - 1.04)                         | 45.55 - 1.06<br>(1.08 - 1.06)                         | 32.33 - 1.03<br>(1.05 - 1.03)                         |
| Multiplicity                    | 28.4 (28.4)                                           | 26.9 (20.5)                                           | 23.4 (18.5)                                           | 25.7 (25.4)                                           | 29.4 (28.1)                                           |
| Completeness (%)                | 97.8 (96.7)                                           | 99.5 (96.4)                                           | 99.2 (93.1)                                           | 99.9 (98.4)                                           | 90.6 (59.8)                                           |
| Mean <i>I</i> / $\sigma_I$      | 18.0 (0.7)                                            | 19.6 (0.4)                                            | 19.8 (0.4)                                            | 18.4 (0.5)                                            | 28.7 (0.5)                                            |
| R <sub>pim</sub>                | 0.054 (1.586)                                         | 0.061 (2.520)                                         | 0.212 (4.479)                                         | 0.106 (2.364)                                         | 0.018 (1.327)                                         |
| CC <sub>1/2</sub>               | 0.999 (0.343)                                         | 0.999 (0.309)                                         | 0.998 (0.388)                                         | 0.999 (0.336)                                         | 0.999 (0.324)                                         |
| Refinement <sup>2</sup>         |                                                       |                                                       |                                                       |                                                       |                                                       |
| R <sub>work</sub> (%)           | 14.39                                                 | 12.91                                                 | 13.55                                                 | 14.74                                                 | 12.51                                                 |
| R <sub>free</sub> (%)           | 16.53                                                 | 15.31                                                 | 15.84                                                 | 17.07                                                 | 14.90                                                 |
| R.M.S. Deviations               |                                                       |                                                       |                                                       |                                                       |                                                       |
| Bonds (Å)                       | 0.007                                                 | 0.010                                                 | 0.008                                                 | 0.009                                                 | 0.010                                                 |
| Angles (°)                      | 0.970                                                 | 1.156                                                 | 1.031                                                 | 1.133                                                 | 1.154                                                 |
| Wilson B (Å <sup>2</sup> )      | 16.14                                                 | 14.76                                                 | 15.35                                                 | 15.41                                                 | 14.82                                                 |
| Mean B factor (Å <sup>2</sup> ) |                                                       |                                                       |                                                       |                                                       |                                                       |
| Total                           | 21.99                                                 | 21.06                                                 | 21.84                                                 | 22.07                                                 | 21.36                                                 |
| Macromolecules                  | 20.38                                                 | 19.34                                                 | 20.12                                                 | 20.39                                                 | 19.66                                                 |
| Ligands                         | 19.42                                                 | 18.54                                                 | 19.03                                                 | 19.30                                                 | 18.60                                                 |
| Water                           | 37.56                                                 | 37.65                                                 | 38.53                                                 | 38.45                                                 | 37.89                                                 |
| Clashscore                      | 1.89                                                  | 1.26                                                  | 1.57                                                  | 1.89                                                  | 1.57                                                  |
| Ramachandran                    |                                                       |                                                       |                                                       |                                                       |                                                       |
| Favored (%)                     | 99.35                                                 | 99.35                                                 | 99.35                                                 | 99.35                                                 | 99.35                                                 |
| Allowed (%)                     | 0.65                                                  | 0.65                                                  | 0.65                                                  | 0.65                                                  | 0.65                                                  |
| Outliers (%)                    | 0.00                                                  | 0.00                                                  | 0.00                                                  | 0.00                                                  | 0.00                                                  |

<sup>1</sup> Reported by *dials.scale* in *DIALS* [44]

<sup>2</sup> Reported by *PHENIX* [50]

**Table S4** Summary statistics for datasets at 290 K

| Crystal<br>PDB ID               | 1<br>7FPR                                             | 2<br>7FPS                                             | 3<br>7FPT                                             | 4<br>7FPU                                             | 5<br>7FPV                                             |
|---------------------------------|-------------------------------------------------------|-------------------------------------------------------|-------------------------------------------------------|-------------------------------------------------------|-------------------------------------------------------|
| Data Collection <sup>1</sup>    |                                                       |                                                       |                                                       |                                                       |                                                       |
| Wavelength (Å)                  | 0.8265                                                | 0.8265                                                | 0.8265                                                | 0.8265                                                | 0.8265                                                |
| Spacegroup                      | <i>P</i> 2 <sub>1</sub> 2 <sub>1</sub> 2 <sub>1</sub> |
| Cell dimensions (Å)             |                                                       |                                                       |                                                       |                                                       |                                                       |
| a                               | 34.18                                                 | 34.19                                                 | 34.19                                                 | 34.18                                                 | 34.20                                                 |
| b                               | 45.49                                                 | 45.56                                                 | 45.59                                                 | 45.60                                                 | 45.56                                                 |
| c                               | 99.10                                                 | 99.05                                                 | 99.05                                                 | 99.07                                                 | 99.04                                                 |
| Total observations              | 3,627,079                                             | 2,149,046                                             | 3,640,008                                             | 3,834,528                                             | 3,765,323                                             |
| Unique observations             | 125,984                                               | 80,476                                                | 123,429                                               | 132,517                                               | 142,372                                               |
| Resolution (Å)                  | 32.31 - 1.07<br>(1.09 - 1.07)                         | 49.53 - 1.26<br>(1.28 - 1.26)                         | 32.32 - 1.07<br>(1.09 - 1.07)                         | 32.31 - 1.05<br>(1.07 - 1.05)                         | 41.39 - 1.04<br>(1.06 - 1.04)                         |
| Multiplicity                    | 28.8 (29.4)                                           | 26.7 (23.3)                                           | 29.5 (30.2)                                           | 28.9 (27.8)                                           | 26.4 (20.7)                                           |
| Completeness (%)                | 95.6 (92.8)                                           | 99.8 (98.4)                                           | 93.5 (90.4)                                           | 94.8 (80.5)                                           | 99.2 (95.4)                                           |
| Mean <i>I</i> / $\sigma_I$      | 23.7 (0.6)                                            | 18.6 (1.1)                                            | 25.8 (0.8)                                            | 24.5 (0.6)                                            | 27.8 (0.5)                                            |
| R <sub>pim</sub>                | 0.111 (2.284)                                         | 0.105 (1.704)                                         | 0.028 (1.401)                                         | 0.027 (1.713)                                         | 0.031 (1.101)                                         |
| CC <sub>1/2</sub>               | 0.999 (0.312)                                         | 0.999 (0.357)                                         | 0.999 (0.555)                                         | 0.999 (0.349)                                         | 0.999 (0.364)                                         |
| Refinement <sup>2</sup>         |                                                       |                                                       |                                                       |                                                       |                                                       |
| R <sub>work</sub> (%)           | 12.37                                                 | 13.17                                                 | 11.84                                                 | 12.25                                                 | 12.60                                                 |
| R <sub>free</sub> (%)           | 14.62                                                 | 16.65                                                 | 14.22                                                 | 14.72                                                 | 14.50                                                 |
| R.M.S. Deviations               |                                                       |                                                       |                                                       |                                                       |                                                       |
| Bonds (Å)                       | 0.008                                                 | 0.009                                                 | 0.009                                                 | 0.009                                                 | 0.007                                                 |
| Angles (°)                      | 1.035                                                 | 1.083                                                 | 1.144                                                 | 1.124                                                 | 1.025                                                 |
| Wilson B (Å <sup>2</sup> )      | 14.98                                                 | 15.94                                                 | 15.00                                                 | 15.29                                                 | 14.11                                                 |
| Mean B factor (Å <sup>2</sup> ) |                                                       |                                                       |                                                       |                                                       |                                                       |
| Total                           | 23.05                                                 | 22.82                                                 | 21.68                                                 | 21.81                                                 | 21.80                                                 |
| Macromolecules                  | 21.04                                                 | 20.95                                                 | 19.93                                                 | 20.10                                                 | 19.84                                                 |
| Ligands                         | 19.85                                                 | 20.08                                                 | 18.66                                                 | 18.81                                                 | 18.35                                                 |
| Water                           | 42.52                                                 | 40.85                                                 | 38.81                                                 | 38.55                                                 | 41.08                                                 |
| Clashscore                      | 1.26                                                  | 2.20                                                  | 1.57                                                  | 1.57                                                  | 1.89                                                  |
| Ramachandran                    |                                                       |                                                       |                                                       |                                                       |                                                       |
| Favored (%)                     | 99.35                                                 | 99.35                                                 | 99.35                                                 | 99.35                                                 | 99.35                                                 |
| Allowed (%)                     | 0.65                                                  | 0.65                                                  | 0.65                                                  | 0.65                                                  | 0.65                                                  |
| Outliers (%)                    | 0.00                                                  | 0.00                                                  | 0.00                                                  | 0.00                                                  | 0.00                                                  |

<sup>1</sup> Reported by *dials.scale* in *DIALS* [44]

<sup>2</sup> Reported by *PHENIX* [50]

**Table S5** Summary statistics for datasets at 300 K

| Crystal<br>PDB ID                    | 1<br>7FPX                                             | 2<br>7FPY                                             | 3<br>7FPZ                                             | 4<br>7FQ0                                             | 5<br>7FQ1                                             |
|--------------------------------------|-------------------------------------------------------|-------------------------------------------------------|-------------------------------------------------------|-------------------------------------------------------|-------------------------------------------------------|
| Data Collection <sup>1</sup>         |                                                       |                                                       |                                                       |                                                       |                                                       |
| Wavelength (Å)                       | 0.8265                                                | 0.8265                                                | 0.8265                                                | 0.8265                                                | 0.8265                                                |
| Spacegroup                           | <i>P</i> 2 <sub>1</sub> 2 <sub>1</sub> 2 <sub>1</sub> |
| Cell dimensions (Å)                  |                                                       |                                                       |                                                       |                                                       |                                                       |
| a                                    | 34.14                                                 | 34.14                                                 | 34.09                                                 | 34.23                                                 | 34.24                                                 |
| b                                    | 45.41                                                 | 45.44                                                 | 45.19                                                 | 45.53                                                 | 45.38                                                 |
| c                                    | 99.04                                                 | 99.00                                                 | 98.89                                                 | 99.14                                                 | 99.23                                                 |
| Total observations                   | 3,350,065                                             | 2,995,768                                             | 1,824,827                                             | 2,913,593                                             | 2,666,016                                             |
| Unique observations                  | 134,806                                               | 114,032                                               | 69,305                                                | 104,829                                               | 95,421                                                |
| Resolution (Å)                       | 49.52 - 1.06<br>(1.08 - 1.06)                         | 99.00 - 1.12<br>(1.14 - 1.12)                         | 49.44 - 1.32<br>(1.34 - 1.32)                         | 45.53 - 1.15<br>(1.17 - 1.15)                         | 32.36 - 1.18<br>(1.20 - 1.18)                         |
| Multiplicity                         | 24.8 (24.7)                                           | 26.3 (26.9)                                           | 26.3 (26.8)                                           | 27.8 (28.3)                                           | 27.9 (28.4)                                           |
| Completeness (%)                     | 99.9 (98.7)                                           | 99.7 (99.7)                                           | 99.9 (99.9)                                           | 98.4 (97.7)                                           | 97.1 (96.3)                                           |
| Mean <i>I</i> / <i>σ<sub>I</sub></i> | 20.6 (0.5)                                            | 18.7 (0.6)                                            | 15.7 (0.7)                                            | 25.0 (0.5)                                            | 22.0 (0.4)                                            |
| R <sub>pim</sub>                     | 0.162 (5.383)                                         | 0.128 (3.646)                                         | 0.409 (1.023)                                         | 0.038 (1.358)                                         | 0.059 (1.140)                                         |
| CC <sub>1/2</sub>                    | 0.999 (0.346)                                         | 0.999 (0.364)                                         | 0.997 (0.443)                                         | 0.999 (0.334)                                         | 0.999 (0.312)                                         |
| Refinement <sup>2</sup>              |                                                       |                                                       |                                                       |                                                       |                                                       |
| R <sub>work</sub> (%)                | 12.90                                                 | 14.11                                                 | 14.34                                                 | 13.28                                                 | 14.19                                                 |
| R <sub>free</sub> (%)                | 15.41                                                 | 17.01                                                 | 18.19                                                 | 16.20                                                 | 17.67                                                 |
| R.M.S. Deviations                    |                                                       |                                                       |                                                       |                                                       |                                                       |
| Bonds (Å)                            | 0.014                                                 | 0.011                                                 | 0.007                                                 | 0.006                                                 | 0.006                                                 |
| Angles (°)                           | 1.357                                                 | 1.127                                                 | 0.977                                                 | 0.935                                                 | 0.875                                                 |
| Wilson B (Å <sup>2</sup> )           | 15.54                                                 | 15.64                                                 | 16.72                                                 | 15.23                                                 | 15.89                                                 |
| Mean B factor (Å <sup>2</sup> )      |                                                       |                                                       |                                                       |                                                       |                                                       |
| Total                                | 22.97                                                 | 22.97                                                 | 23.59                                                 | 24.08                                                 | 23.89                                                 |
| Macromolecules                       | 21.12                                                 | 21.14                                                 | 21.68                                                 | 21.91                                                 | 21.99                                                 |
| Ligands                              | 19.50                                                 | 19.62                                                 | 20.84                                                 | 20.53                                                 | 20.69                                                 |
| Water                                | 41.23                                                 | 40.98                                                 | 42.02                                                 | 45.20                                                 | 42.40                                                 |
| Clashscore                           | 2.52                                                  | 1.89                                                  | 1.89                                                  | 1.57                                                  | 1.26                                                  |
| Ramachandran                         |                                                       |                                                       |                                                       |                                                       |                                                       |
| Favored (%)                          | 99.35                                                 | 99.35                                                 | 99.35                                                 | 99.35                                                 | 99.35                                                 |
| Allowed (%)                          | 0.65                                                  | 0.65                                                  | 0.65                                                  | 0.65                                                  | 0.65                                                  |
| Outliers (%)                         | 0.00                                                  | 0.00                                                  | 0.00                                                  | 0.00                                                  | 0.00                                                  |

<sup>1</sup> Reported by *dials.scale* in *DIALS* [44]

<sup>2</sup> Reported by *PHENIX* [50]

**Table S6** Summary statistics for datasets at 310 K

| Crystal<br>PDB ID               | 1<br>7FQ3                                             | 2<br>7FQ4                                             | 3<br>7FQ5                                             |
|---------------------------------|-------------------------------------------------------|-------------------------------------------------------|-------------------------------------------------------|
| Data Collection <sup>1</sup>    |                                                       |                                                       |                                                       |
| Wavelength (Å)                  | 0.8265                                                | 0.8265                                                | 0.8265                                                |
| Spacegroup                      | <i>P</i> 2 <sub>1</sub> 2 <sub>1</sub> 2 <sub>1</sub> | <i>P</i> 2 <sub>1</sub> 2 <sub>1</sub> 2 <sub>1</sub> | <i>P</i> 2 <sub>1</sub> 2 <sub>1</sub> 2 <sub>1</sub> |
| Cell dimensions (Å)             |                                                       |                                                       |                                                       |
| a                               | 34.18                                                 | 34.15                                                 | 34.19                                                 |
| b                               | 45.49                                                 | 45.23                                                 | 45.30                                                 |
| c                               | 99.33                                                 | 99.22                                                 | 99.25                                                 |
| Total observations              | 1,969,232                                             | 1,829,107                                             | 1,788,359                                             |
| Unique observations             | 73,267                                                | 67,810                                                | 65,420                                                |
| Resolution (Å)                  | 41.36 - 1.30<br>(1.32 - 1.30)                         | 33.42 - 1.33<br>(1.36 - 1.33)                         | 99.25 - 1.35<br>(1.37 - 1.35)                         |
| Multiplicity                    | 26.9 (27.1)                                           | 27.3 (28.6)                                           | 27.3 (28.9)                                           |
| Completeness (%)                | 99.4 (92.4)                                           | 99.1 (97.9)                                           | 99.5 (89.5)                                           |
| Mean <i>I</i> / $\sigma_I$      | 15.4 (0.4)                                            | 24.5 (0.6)                                            | 21.3 (0.5)                                            |
| R <sub>pim</sub>                | 0.310 (1.596)                                         | 0.080 (0.848)                                         | 0.108 (1.048)                                         |
| CC <sub>1/2</sub>               | 0.997 (0.360)                                         | 0.999 (0.301)                                         | 0.999 (0.328)                                         |
| Refinement <sup>2</sup>         |                                                       |                                                       |                                                       |
| R <sub>work</sub> (%)           | 15.24                                                 | 14.61                                                 | 14.96                                                 |
| R <sub>free</sub> (%)           | 18.66                                                 | 18.57                                                 | 18.96                                                 |
| R.M.S. Deviations               |                                                       |                                                       |                                                       |
| Bonds (Å)                       | 0.006                                                 | 0.008                                                 | 0.009                                                 |
| Angles (°)                      | 1.001                                                 | 1.037                                                 | 1.007                                                 |
| Wilson B (Å <sup>2</sup> )      | 17.48                                                 | 15.77                                                 | 17.55                                                 |
| Mean B factor (Å <sup>2</sup> ) |                                                       |                                                       |                                                       |
| Total                           | 23.71                                                 | 24.37                                                 | 25.03                                                 |
| Macromolecules                  | 21.58                                                 | 22.22                                                 | 22.77                                                 |
| Ligands                         | 20.69                                                 | 21.76                                                 | 21.86                                                 |
| Water                           | 44.24                                                 | 44.80                                                 | 46.82                                                 |
| Clashscore                      | 1.89                                                  | 2.20                                                  | 3.15                                                  |
| Ramachandran                    |                                                       |                                                       |                                                       |
| Favored (%)                     | 99.35                                                 | 99.35                                                 | 99.35                                                 |
| Allowed (%)                     | 0.65                                                  | 0.65                                                  | 0.65                                                  |
| Outliers (%)                    | 0.00                                                  | 0.00                                                  | 0.00                                                  |

<sup>1</sup> Reported by *dials.scale* in *DIALS* [44]

<sup>2</sup> Reported by *PHENIX* [50]

**Table S7** Summary statistics for multi-crystal, multi-temperature datasets

|                                   |                                                       |                                                       |                                                       |                                                       |                                                       |
|-----------------------------------|-------------------------------------------------------|-------------------------------------------------------|-------------------------------------------------------|-------------------------------------------------------|-------------------------------------------------------|
| Temperature                       | 270 K                                                 | 280 K                                                 | 290 K                                                 | 300 K                                                 | 310 K                                                 |
| PDB ID                            | 5SSW                                                  | 7FPQ                                                  | 7FPW                                                  | 7FQ2                                                  | 7FQ6                                                  |
| Number of Crystals                | 4                                                     | 5                                                     | 5                                                     | 5                                                     | 3                                                     |
| Data Collection <sup>1</sup>      |                                                       |                                                       |                                                       |                                                       |                                                       |
| Wavelength (Å)                    | 0.8265                                                | 0.8265                                                | 0.8265                                                | 0.8265                                                | 0.8265                                                |
| Spacegroup                        | <i>P</i> 2 <sub>1</sub> 2 <sub>1</sub> 2 <sub>1</sub> |
| Cell dimensions (Å)               |                                                       |                                                       |                                                       |                                                       |                                                       |
| a                                 | 34.10                                                 | 34.16                                                 | 34.19                                                 | 34.14                                                 | 34.18                                                 |
| b                                 | 45.28                                                 | 45.50                                                 | 45.56                                                 | 45.41                                                 | 45.30                                                 |
| c                                 | 99.08                                                 | 99.08                                                 | 99.05                                                 | 99.04                                                 | 99.25                                                 |
| Total observations                | 14,601,731                                            | 19,116,204                                            | 19,028,898                                            | 17,134,249                                            | 6,176,809                                             |
| Unique observations               | 133,686                                               | 147,105                                               | 142,798                                               | 131,221                                               | 74,931                                                |
| Resolution (Å)                    | 49.54 - 1.06<br>(1.08 - 1.06)                         | 45.50 - 1.03<br>(1.05 - 1.03)                         | 49.53 - 1.04<br>(1.06 - 1.04)                         | 99.04 - 1.07<br>(1.09 - 1.07)                         | 99.25 - 1.29<br>(1.31 - 1.29)                         |
| Multiplicity                      | 109.1 (107.6)                                         | 129.9 (87.0)                                          | 133.2 (101.9)                                         | 130.5 (128.3)                                         | 82.2 (84.7)                                           |
| Completeness (%)                  | 99.4 (96.5)                                           | 99.8 (96.3)                                           | 99.5 (96.0)                                           | 100.0 (100.0)                                         | 99.8 (94.0)                                           |
| Mean <i>I</i> / $\sigma$ <i>I</i> | 36.9 (1.4)                                            | 45.5 (0.7)                                            | 44.0 (0.8)                                            | 38.5 (0.8)                                            | 31.6 (0.6)                                            |
| R <sub>pim</sub>                  | 0.050 (2.423)                                         | 0.045 (3.530)                                         | 0.052 (15.696)                                        | 0.170 (1.657)                                         | 0.098 (0.839)                                         |
| CC <sub>1/2</sub>                 | 1.000 (0.446)                                         | 1.000 (0.429)                                         | 1.000 (0.398)                                         | 1.000 (0.557)                                         | 1.000 (0.326)                                         |
| Refinement <sup>2</sup>           |                                                       |                                                       |                                                       |                                                       |                                                       |
| R <sub>work</sub> (%)             | 12.34                                                 | 11.83                                                 | 11.55                                                 | 12.13                                                 | 13.96                                                 |
| R <sub>free</sub> (%)             | 14.39                                                 | 13.84                                                 | 13.52                                                 | 14.38                                                 | 17.89                                                 |
| R.M.S. Deviations                 |                                                       |                                                       |                                                       |                                                       |                                                       |
| Bonds (Å)                         | 0.009                                                 | 0.008                                                 | 0.009                                                 | 0.010                                                 | 0.012                                                 |
| Angles (°)                        | 1.137                                                 | 1.072                                                 | 1.167                                                 | 1.146                                                 | 1.161                                                 |
| Wilson B (Å <sup>2</sup> )        | 15.47                                                 | 15.24                                                 | 14.64                                                 | 15.13                                                 | 18.97                                                 |
| Mean B factor (Å <sup>2</sup> )   |                                                       |                                                       |                                                       |                                                       |                                                       |
| Total                             | 21.22                                                 | 21.27                                                 | 21.71                                                 | 23.43                                                 | 25.21                                                 |
| Macromolecules                    | 19.62                                                 | 19.53                                                 | 19.85                                                 | 21.38                                                 | 23.07                                                 |
| Ligands                           | 18.63                                                 | 18.61                                                 | 18.14                                                 | 19.53                                                 | 22.40                                                 |
| Water                             | 36.78                                                 | 37.65                                                 | 40.14                                                 | 43.78                                                 | 45.87                                                 |
| Clashscore                        | 1.89                                                  | 1.57                                                  | 1.57                                                  | 2.20                                                  | 2.20                                                  |
| Ramachandran                      |                                                       |                                                       |                                                       |                                                       |                                                       |
| Favored (%)                       | 99.35                                                 | 99.35                                                 | 99.35                                                 | 99.35                                                 | 99.35                                                 |
| Allowed (%)                       | 0.65                                                  | 0.65                                                  | 0.65                                                  | 0.65                                                  | 0.65                                                  |
| Outliers (%)                      | 0.00                                                  | 0.00                                                  | 0.00                                                  | 0.00                                                  | 0.00                                                  |

<sup>1</sup> Reported by *dials.scale* in *DIALS* [44]

<sup>2</sup> Reported by *PHENIX* [50]

**Table S8** Summary statistics for single-crystal, multi-temperature datasets (crystal 1)

|                                              |                                                       |                                                       |                                                       |                                                       |                                                       |
|----------------------------------------------|-------------------------------------------------------|-------------------------------------------------------|-------------------------------------------------------|-------------------------------------------------------|-------------------------------------------------------|
| Temperature                                  | 295 K                                                 | 310 K                                                 | 295 K                                                 | 280 K                                                 | 295 K                                                 |
| Pass on Crystal                              | 1                                                     | 2                                                     | 3                                                     | 4                                                     | 5                                                     |
| PDB ID                                       | 7FQ7                                                  | 7FQ8                                                  | 7FQ9                                                  | 7FQA                                                  | 7FQB                                                  |
| Data Collection <sup>1</sup>                 |                                                       |                                                       |                                                       |                                                       |                                                       |
| Wavelength (Å)                               | 0.8265                                                | 0.8265                                                | 0.8265                                                | 0.8265                                                | 0.8265                                                |
| Spacegroup                                   | <i>P</i> 2 <sub>1</sub> 2 <sub>1</sub> 2 <sub>1</sub> |
| Cell dimensions (Å)                          |                                                       |                                                       |                                                       |                                                       |                                                       |
| a                                            | 34.26                                                 | 34.29                                                 | 34.27                                                 | 34.20                                                 | 34.22                                                 |
| b                                            | 45.59                                                 | 45.65                                                 | 45.63                                                 | 45.46                                                 | 45.47                                                 |
| c                                            | 98.96                                                 | 99.03                                                 | 98.97                                                 | 98.99                                                 | 99.02                                                 |
| Total observations                           | 3,400,772                                             | 2,601,689                                             | 3,315,426                                             | 3,572,742                                             | 3,053,872                                             |
| Unique observations                          | 117,634                                               | 89,462                                                | 115,024                                               | 123,443                                               | 105,250                                               |
| Resolution (Å)                               | 32.37 - 1.10<br>(1.12 - 1.10)                         | 41.46 - 1.21<br>(1.23 - 1.21)                         | 41.44 - 1.11<br>(1.13 - 1.11)                         | 32.32 - 1.08<br>(1.10 - 1.08)                         | 32.34 - 1.14<br>(1.16 - 1.14)                         |
| Multiplicity                                 | 28.9 (28.8)                                           | 29.1 (29.5)                                           | 28.8 (28.6)                                           | 28.9 (29.0)                                           | 29.0 (28.0)                                           |
| Completeness (%)                             | 96.7 (95.6)                                           | 97.6 (96.6)                                           | 97.1 (96.4)                                           | 96.5 (94.5)                                           | 96.6 (96.2)                                           |
| Mean <i>I</i> / $\sigma$ <sub><i>I</i></sub> | 12.8 (0.3)                                            | 14.1 (0.4)                                            | 12.6 (0.3)                                            | 12.7 (0.3)                                            | 13.5 (0.4)                                            |
| R <sub>pim</sub>                             | 0.027 (1.213)                                         | 0.037 (1.105)                                         | 0.029 (1.257)                                         | 0.025 (1.426)                                         | 0.028 (1.245)                                         |
| CC <sub>1/2</sub>                            | 0.999 (0.324)                                         | 0.999 (0.380)                                         | 0.999 (0.354)                                         | 0.999 (0.311)                                         | 0.999 (0.332)                                         |
| Refinement <sup>2</sup>                      |                                                       |                                                       |                                                       |                                                       |                                                       |
| R <sub>work</sub> (%)                        | 12.80                                                 | 12.64                                                 | 13.13                                                 | 13.11                                                 | 13.36                                                 |
| R <sub>free</sub> (%)                        | 15.89                                                 | 16.40                                                 | 15.94                                                 | 15.89                                                 | 16.48                                                 |
| R.M.S. Deviations                            |                                                       |                                                       |                                                       |                                                       |                                                       |
| Bonds (Å)                                    | 0.008                                                 | 0.011                                                 | 0.007                                                 | 0.005                                                 | 0.006                                                 |
| Angles (°)                                   | 1.054                                                 | 1.192                                                 | 1.008                                                 | 0.884                                                 | 0.953                                                 |
| Wilson B (Å <sup>2</sup> )                   | 17.06                                                 | 16.74                                                 | 17.13                                                 | 17.26                                                 | 16.81                                                 |
| Mean B factor (Å <sup>2</sup> )              |                                                       |                                                       |                                                       |                                                       |                                                       |
| Total                                        | 22.18                                                 | 23.86                                                 | 23.34                                                 | 21.75                                                 | 22.30                                                 |
| Macromolecules                               | 20.38                                                 | 21.68                                                 | 21.54                                                 | 20.09                                                 | 20.46                                                 |
| Ligands                                      | 18.80                                                 | 19.14                                                 | 19.88                                                 | 18.77                                                 | 18.97                                                 |
| Water                                        | 39.94                                                 | 45.87                                                 | 41.17                                                 | 38.11                                                 | 40.38                                                 |
| Clashscore                                   | 1.26                                                  | 2.20                                                  | 1.26                                                  | 1.26                                                  | 1.89                                                  |
| Ramachandran                                 |                                                       |                                                       |                                                       |                                                       |                                                       |
| Favored (%)                                  | 99.35                                                 | 99.35                                                 | 99.35                                                 | 99.35                                                 | 99.35                                                 |
| Allowed (%)                                  | 0.65                                                  | 0.65                                                  | 0.65                                                  | 0.65                                                  | 0.65                                                  |
| Outliers (%)                                 | 0.00                                                  | 0.00                                                  | 0.00                                                  | 0.00                                                  | 0.00                                                  |

<sup>1</sup> Reported by *dials.scale* in *DIALS* [44]

<sup>2</sup> Reported by *PHENIX* [50]

**Table S9** Summary statistics for single-crystal, multi-temperature datasets (crystal 2)

|                                              |                                                       |                                                       |                                                       |                                                       |                                                       |
|----------------------------------------------|-------------------------------------------------------|-------------------------------------------------------|-------------------------------------------------------|-------------------------------------------------------|-------------------------------------------------------|
| Temperature                                  | 295 K                                                 | 280 K                                                 | 295 K                                                 | 310 K                                                 | 295 K                                                 |
| Pass on Crystal                              | 1                                                     | 2                                                     | 3                                                     | 4                                                     | 5                                                     |
| PDB ID                                       | 7FQC                                                  | 7FQD                                                  | 7FQE                                                  | 7FQF                                                  | 7FQG                                                  |
| Data Collection <sup>1</sup>                 |                                                       |                                                       |                                                       |                                                       |                                                       |
| Wavelength (Å)                               | 0.9795                                                | 0.9795                                                | 0.9795                                                | 0.9795                                                | 0.9795                                                |
| Spacegroup                                   | <i>P</i> 2 <sub>1</sub> 2 <sub>1</sub> 2 <sub>1</sub> |
| Cell dimensions (Å)                          |                                                       |                                                       |                                                       |                                                       |                                                       |
| a                                            | 34.26                                                 | 34.20                                                 | 34.25                                                 | 34.30                                                 | 34.28                                                 |
| b                                            | 45.63                                                 | 45.52                                                 | 45.60                                                 | 45.71                                                 | 45.68                                                 |
| c                                            | 99.03                                                 | 99.06                                                 | 99.09                                                 | 99.12                                                 | 99.04                                                 |
| Total observations                           | 2,722,807                                             | 2,756,746                                             | 2,721,740                                             | 2,438,928                                             | 2,674,944                                             |
| Unique observations                          | 97,218                                                | 99,044                                                | 97,041                                                | 86,426                                                | 95,020                                                |
| Resolution (Å)                               | 49.52 - 1.18<br>(1.20 - 1.18)                         | 49.53 - 1.17<br>(1.19 - 1.17)                         | 49.55 - 1.18<br>(1.20 - 1.18)                         | 49.56 - 1.23<br>(1.25 - 1.23)                         | 49.52 - 1.19<br>(1.21 - 1.19)                         |
| Multiplicity                                 | 28.0 (23.7)                                           | 27.8 (21.2)                                           | 28.0 (23.8)                                           | 28.2 (28.4)                                           | 28.1 (26.5)                                           |
| Completeness (%)                             | 98.5 (94.9)                                           | 98.2 (91.2)                                           | 98.4 (94.4)                                           | 98.9 (98.2)                                           | 98.6 (95.5)                                           |
| Mean <i>I</i> / $\sigma$ <sub><i>I</i></sub> | 13.0 (0.4)                                            | 12.8 (0.4)                                            | 12.6 (0.4)                                            | 12.3 (0.3)                                            | 12.1 (0.4)                                            |
| R <sub>pim</sub>                             | 0.033 (1.029)                                         | 0.031 (1.107)                                         | 0.033 (1.127)                                         | 0.044 (1.404)                                         | 0.038 (1.220)                                         |
| CC <sub>1/2</sub>                            | 0.999 (0.359)                                         | 0.999 (0.308)                                         | 0.999 (0.308)                                         | 0.999 (0.321)                                         | 0.999 (0.333)                                         |
| Refinement <sup>2</sup>                      |                                                       |                                                       |                                                       |                                                       |                                                       |
| R <sub>work</sub> (%)                        | 12.74                                                 | 14.09                                                 | 12.88                                                 | 13.06                                                 | 13.13                                                 |
| R <sub>free</sub> (%)                        | 16.00                                                 | 16.17                                                 | 16.38                                                 | 16.91                                                 | 16.41                                                 |
| R.M.S. Deviations                            |                                                       |                                                       |                                                       |                                                       |                                                       |
| Bonds (Å)                                    | 0.008                                                 | 0.008                                                 | 0.009                                                 | 0.013                                                 | 0.005                                                 |
| Angles (°)                                   | 1.028                                                 | 1.030                                                 | 1.114                                                 | 1.238                                                 | 0.905                                                 |
| Wilson B (Å <sup>2</sup> )                   | 17.21                                                 | 17.63                                                 | 17.19                                                 | 17.08                                                 | 16.96                                                 |
| Mean B factor (Å <sup>2</sup> )              |                                                       |                                                       |                                                       |                                                       |                                                       |
| Total                                        | 22.47                                                 | 21.53                                                 | 22.56                                                 | 25.06                                                 | 22.56                                                 |
| Macromolecules                               | 20.65                                                 | 19.92                                                 | 20.71                                                 | 22.89                                                 | 20.73                                                 |
| Ligands                                      | 19.14                                                 | 18.95                                                 | 19.18                                                 | 20.60                                                 | 19.09                                                 |
| Water                                        | 40.35                                                 | 37.10                                                 | 40.75                                                 | 46.94                                                 | 40.71                                                 |
| Clashscore                                   | 2.20                                                  | 1.89                                                  | 2.20                                                  | 2.20                                                  | 1.57                                                  |
| Ramachandran                                 |                                                       |                                                       |                                                       |                                                       |                                                       |
| Favored (%)                                  | 99.35                                                 | 99.35                                                 | 99.35                                                 | 99.35                                                 | 99.35                                                 |
| Allowed (%)                                  | 0.65                                                  | 0.65                                                  | 0.65                                                  | 0.65                                                  | 0.65                                                  |
| Outliers (%)                                 | 0.00                                                  | 0.00                                                  | 0.00                                                  | 0.00                                                  | 0.00                                                  |

<sup>1</sup> Reported by *dials.scale* in *DIALS* [44]

<sup>2</sup> Reported by *PHENIX* [50]

**Table S10** Data reduction statistics for DHFR EF-X from Laue diffraction

| Dataset                        | Off           | Off (reduced sym.) | 200 ns (+3.5 kV) | 200 ns (-3.5 kV) |
|--------------------------------|---------------|--------------------|------------------|------------------|
| No. of Images                  | 363           | 363                | 363              | 363              |
| Spacegroup                     | $P2_12_12_1$  | $P2_1$             | $P2_1$           | $P2_1$           |
| Cell dim. (Å)                  |               |                    |                  |                  |
| a                              | 34.29         | 34.29              | 34.29            | 34.29            |
| b                              | 45.53         | 45.53              | 45.53            | 45.53            |
| c                              | 99.00         | 99.00              | 99.00            | 99.00            |
| Total obs.                     | 723,372       | 723,372            | 710,019          | 709,472          |
| Unique obs.                    | 17,637        | 33,671             | 33,671           | 33,669           |
| Resolution (Å)                 | 41.36 - 1.70  | 41.36 - 1.70       | 41.36 - 1.70     | 49.50 - 1.70     |
|                                | (1.76 - 1.70) | (1.76 - 1.70)      | (1.76 - 1.70)    | (1.76 - 1.70)    |
| Multiplicity                   | 35.53 (27.40) | 18.63 (14.16)      | 18.35 (13.73)    | 18.34 (13.68)    |
| Completeness (%)               | 99.5 (99.4)   | 99.4 (99.5)        | 99.4 (99.5)      | 99.4 (99.5)      |
| Mean $F/\sigma_F$ <sup>1</sup> | 39.38 (19.51) | 28.54 (14.00)      | 28.85 (13.86)    | 28.85 (13.83)    |
| CC <sub>1/2</sub> <sup>1</sup> | 0.991 (0.957) | 0.987 (0.927)      | 0.989 (0.929)    | 0.988 (0.929)    |

<sup>1</sup> Statistics were computed based on output from *careless* [46]

**Table S11** Refinement statistics for DHFR EF-X<sup>1</sup>

| Dataset                         | Off                                                   | On                      |
|---------------------------------|-------------------------------------------------------|-------------------------|
| PDB ID                          | 8G4Z                                                  | 8G50                    |
| Spacegroup                      | <i>P</i> 2 <sub>1</sub> 2 <sub>1</sub> 2 <sub>1</sub> | <i>P</i> 2 <sub>1</sub> |
| Extrapolation factor            | N/A                                                   | 8                       |
| Resolution (Å)                  | 1.70                                                  | 1.70                    |
| Unique observations             | 17,636                                                | 33,646                  |
| Completeness                    | 99.43                                                 | 99.26                   |
| R <sub>work</sub> (%)           | 14.71                                                 | 30.37                   |
| R <sub>free</sub> (%)           | 19.53                                                 | 34.98                   |
| R.M.S. Deviations               |                                                       |                         |
| Bonds (Å)                       | 0.009                                                 | 0.011                   |
| Angles (°)                      | 1.15                                                  | 1.09                    |
| Mean B factor (Å <sup>2</sup> ) |                                                       |                         |
| Total                           | 8.53                                                  | 5.54                    |
| Macromolecules                  | 7.52                                                  | 5.16                    |
| Ligands                         | 7.74                                                  | 4.81                    |
| Water                           | 20.08                                                 | 9.97                    |
| Clashscore                      | 2.01                                                  | 3.05                    |
| Ramachandran                    |                                                       |                         |
| Favored (%)                     | 99.35                                                 | 99.35                   |
| Allowed (%)                     | 0.65                                                  | 0.65                    |
| Outliers (%)                    | 0.00                                                  | 0.00                    |

<sup>1</sup> Reported by *PHENIX* [50]
